# Supplementary material for: Fucoxanthin Attenuates Free Fatty Acid-Induced Nonalcoholic Fatty Liver Disease by Regulating Lipid Metabolism/Oxidative Stress/Inflammation via the AMPK/Nrf2/TLR4 Signaling Pathway
Source: MDPI journal article supplement (doi:10.3390/md20040225), 2022-03-25

**Figure S1: Original image of Western blot**

The order of sample loading is from left to right: Control FFA L-Fx M-Fx H-Fx

p-AMPK

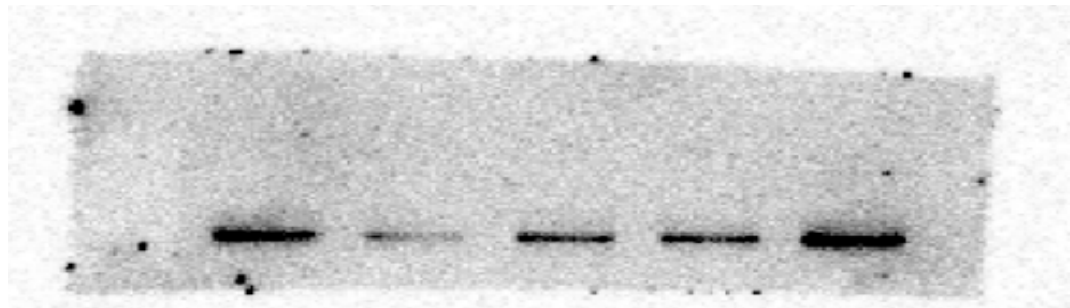

AMPK

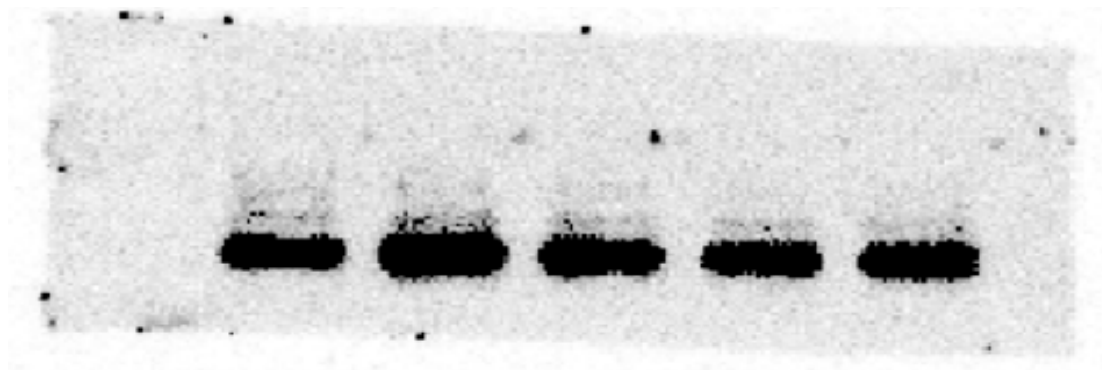

PPAR- $\alpha$

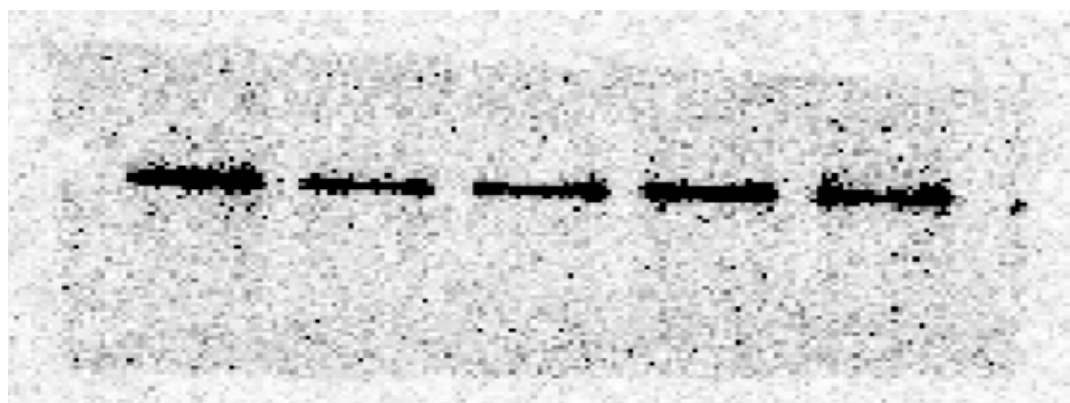

SREBP-1C

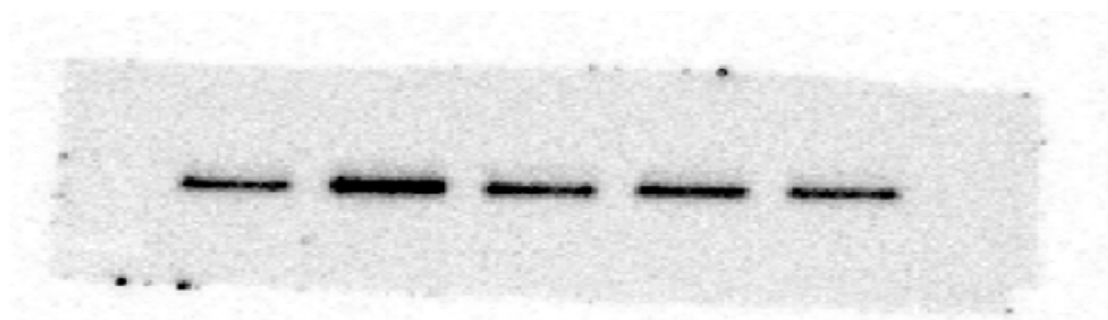

p-ACC

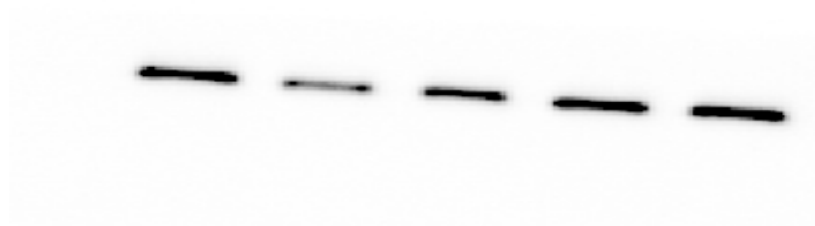

ACC

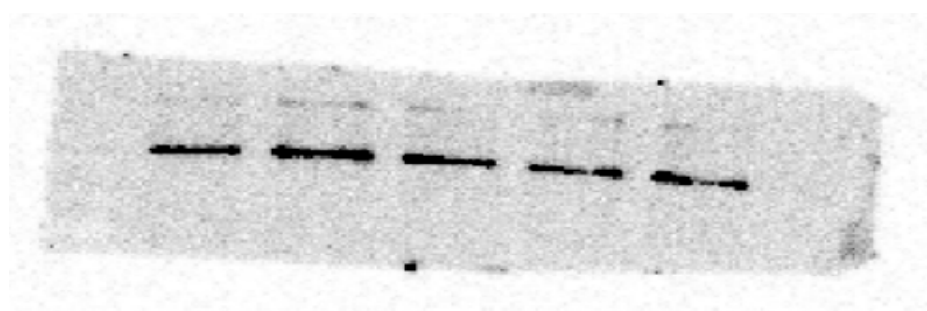

CPT-1

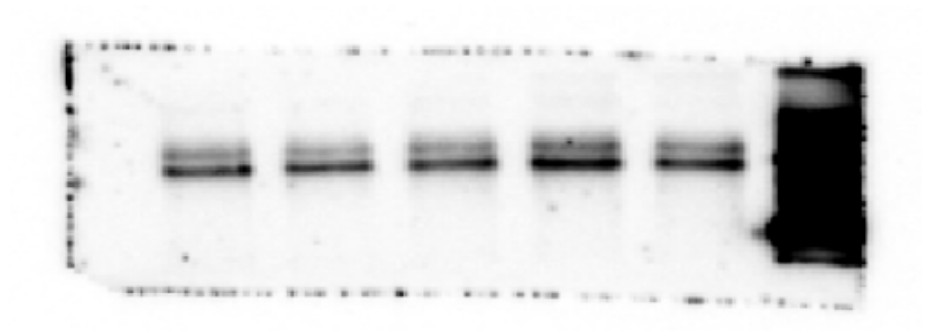

FAS

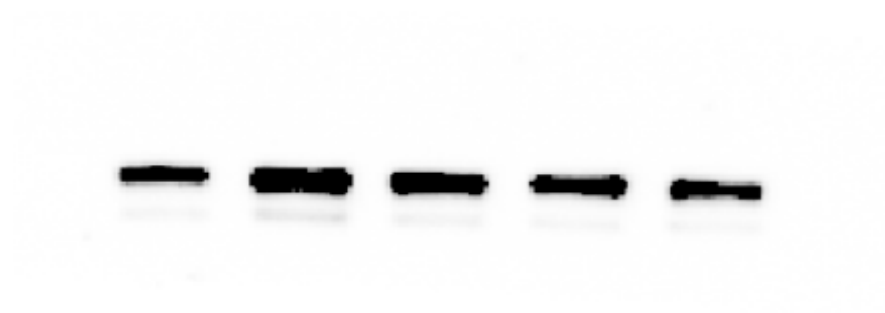

GAPDH-1

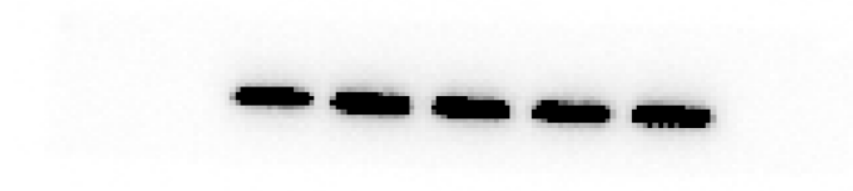

Keap1

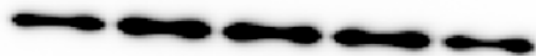

Nrf2

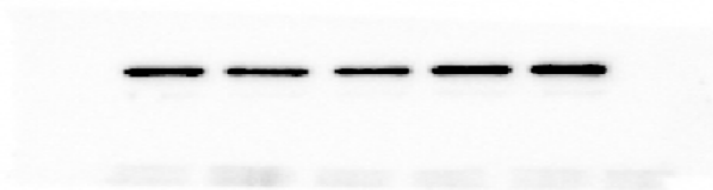

HO-1

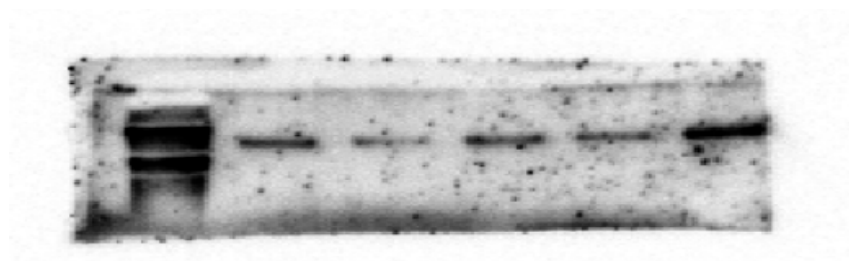

NQO1

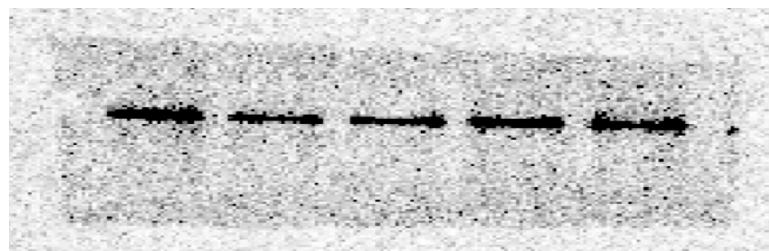

GCLM

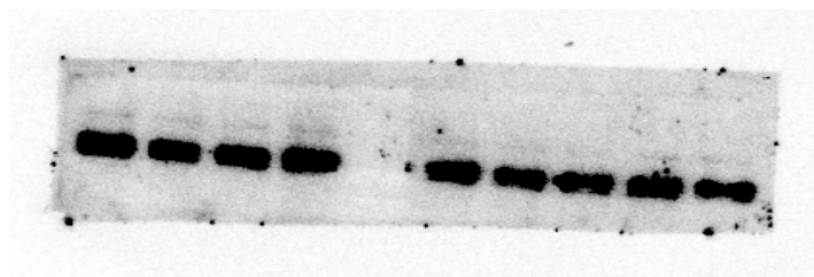

GAPDH-2

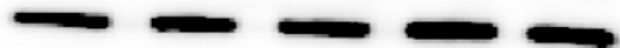

TLR4

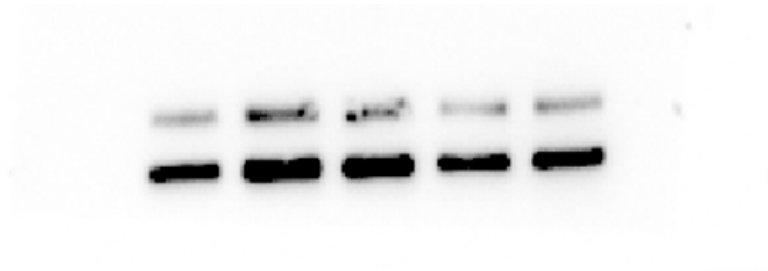

MyD88

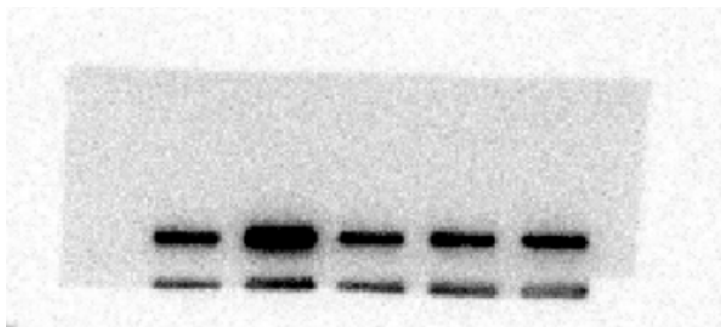

p-I $\kappa$ B $\alpha$

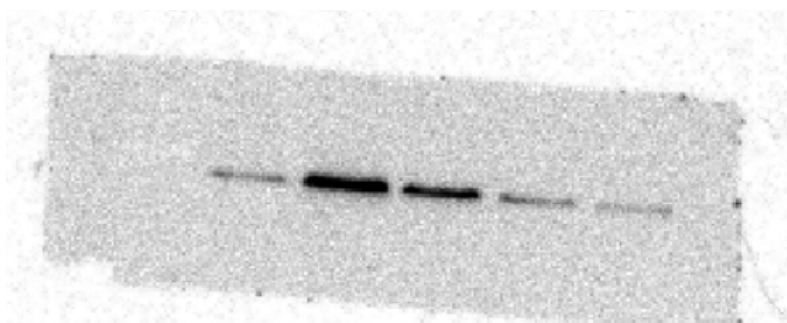

p-NF- $\kappa$ B p65

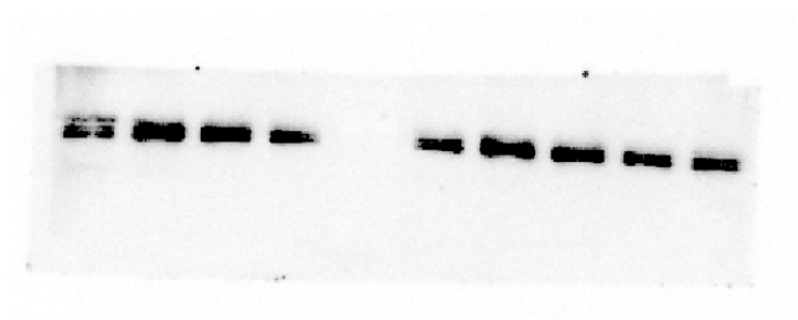

GAPDH-3

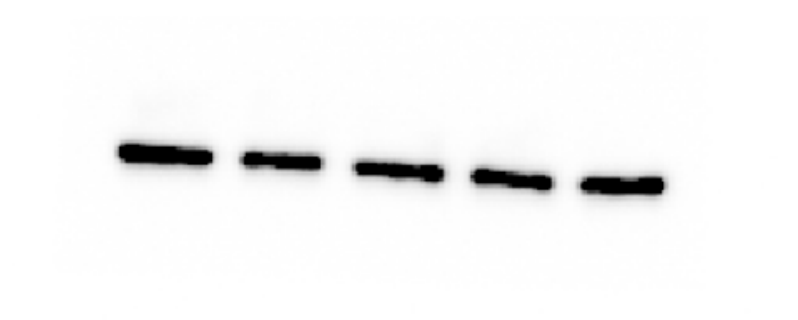

Supplement: s1 [file s1]
